# Supplementary material
Source: PubMed Central journal article supplement (PMC3329185)
Supplement: ismej2011161x1.pdf [file ismej2011161x1.pdf]

1 **Appendix A: mathematical model of growth of two species of *Lactobacillus* in**  
2 **the mouse forestomach.**

3 A mathematical model is presented that describes competition between two strains  
4 (100-23 and 100-33) in the presence of two substrates (maltose and glucose). For  
5 simplicity it is assumed that the mouse forestomach acts as a continuous fermentor,  
6 so that explicit expressions for the steady state concentrations of substrate and  
7 bacteria can be obtained. These are then be used to derive conditions for which the  
8 two strains can co-exist.

9 Concentrations of substrate and bacteria in the vessel are denoted by  $C$  and  
10  $B$ , respectively (mg/mL). The turn-over rate is denoted by  $k$  ( $\text{h}^{-1}$ ). Substrate is  
11 assumed to enter the forestomach continuously at a rate of  $k C_{in}$  where  $C_{in}$  denotes  
12 the substrate concentration (mg/mL) in the medium entering the vessel. Absorption  
13 of water and substrates is assumed to be absent. Gain in bacterial mass is modelled  
14 as the product of the observed fractional growth rate ( $G_{obs}$ ,  $\text{h}^{-1}$ ) multiplied by  $B$ . The  
15 substrate required to achieve this growth is given by  $G_{obs} B/E$ , where  $E$  (mg  
16 biomass/mg substrate) is the efficiency of converting substrate into biomass ( $E$  is  
17 assumed less than 1). Bacterial death is assumed negligible with loss of biomass  
18 occurring only via the outlet (modelled as  $k B$ ). Superscripts 'malt' and 'gluc' refer to  
19 maltose and glucose respectively, and subscripts '1' and '2' refer to strains 100-23  
20 and 100-33. The change in substrate concentration is given by inflow minus outflow  
21 minus use for bacterial growth. The change in bacteria is given by bacterial growth  
22 on maltose and glucose minus outflow:

$$\frac{dC^{malt}}{dt} = k C_{in}^{malt} - k C^{malt} - B_1 G_{1obs}^{malt} / E_1^{malt} - B_2 G_{2obs}^{malt} / E_2^{malt} \quad (1)$$

$$\frac{dC^{gluc}}{dt} = k C_{in}^{gluc} - k C^{gluc} - B_1 G_{1obs}^{gluc} / E_1^{gluc} - B_2 G_{2obs}^{gluc} / E_2^{gluc} \quad (2)$$

$$\frac{dB_1}{dt} = B_1 G_{1obs}^{malt} + B_1 G_{1obs}^{gluc} - k B_1 \quad (3)$$

$$\frac{dB_2}{dt} = B_2 G_{2obs}^{malt} + B_2 G_{2obs}^{gluc} - k B_2 \quad (4)$$

23 The observed fractional growth rates on maltose and glucose for strain 1 are

24 modelled as (Ballyk & Wolkowics, 1993)

$$G_{1obs}^{malt} = G_1^{malt} \frac{C^{malt} / M_1^{malt}}{1 + C^{malt} / M_1^{malt} + C^{gluc} / M_1^{gluc}} \quad (5)$$

$$G_{1obs}^{gluc} = G_1^{gluc} \frac{C^{gluc} / M_1^{gluc}}{1 + C^{malt} / M_1^{malt} + C^{gluc} / M_1^{gluc}} \quad (6)$$

25 where  $G_1^{malt}$  ( $h^{-1}$ ) is the maximum fractional growth rate on maltose and  $M_1^{malt}$

26 (mg/mL) the half saturation constant (concentration at which half the maximum

27 growth rate is achieved).  $G_1^{gluc}$  and  $M_1^{gluc}$  are similarly defined for growth on

28 glucose. This model formulation assumes that strain 1 is able to feed on both

29 substrates simultaneously. The concentrations of each of the substrates with respect

30 to the values of  $M$  determine whether feeding will occur mainly on maltose (when

31  $C^{malt} / M_1^{malt} > C^{gluc} / M_1^{gluc}$ ) or glucose (when  $C^{malt} / M_1^{malt} < C^{gluc} / M_1^{gluc}$ ). Note

32 that when one of the substrates is absent, glucose say, growth on maltose simplifies

33 to the standard Monod model:  $G_{1obs}^{malt} = G_1^{malt} C^{malt} / (M_1^{malt} + C^{malt})$ . Growth of

34 species 2 on maltose and glucose is defined analogously to that of species 1:

$$G_{2obs}^{malt} = G_2^{malt} \frac{C^{malt} / M_2^{malt}}{1 + C^{malt} / M_2^{malt} + C^{gluc} / M_2^{gluc}} \quad (7)$$

$$G_{2obs}^{gluc} = G_2^{gluc} \frac{C^{gluc}/M_2^{gluc}}{1 + C^{malt}/M_2^{malt} + C^{gluc}/M_2^{gluc}} \quad (8)$$

35

36 *Requirements for co-existence of two species*

37 In steady state the concentrations of substrates and bacteria are constant, so that  
 38 equations (1)-(4) will be equal to zero. It can be shown that for  $B_1$  and  $B_2$  to co-exist  
 39 in steady state, the following two requirements need to be met (derivations given in  
 40 Appendix C):

$$\frac{G_1^{malt} - k}{M_1^{malt}} > \frac{G_2^{malt} - k}{M_2^{malt}} \quad \text{and} \quad \frac{G_2^{gluc} - k}{M_2^{gluc}} > \frac{G_1^{gluc} - k}{M_1^{gluc}} \quad (9)$$

and

$$\frac{G_1^{gluc}/M_1^{gluc}}{G_1^{malt}/M_1^{malt}} \frac{E_1^{malt}}{E_1^{gluc}} < \frac{(C_{in}^{gluc} - C^{gluc})/C^{gluc}}{(C_{in}^{malt} - C^{malt})/C^{malt}} < \frac{G_2^{gluc}/M_2^{gluc}}{G_2^{malt}/M_2^{malt}} \frac{E_2^{malt}}{E_2^{gluc}} \quad (10)$$

41 Equation (9) states that species 1 should have a relative advantage on maltose  
 42 compared to species 2 (i.e.  $G_1^{malt}$  relatively large and  $M_1^{malt}$  relatively small  
 43 compared to  $G_2^{malt}$  and  $M_2^{malt}$ , respectively), whilst at the same time species 2  
 44 should have a relative advantage on glucose compared to species 1. The right hand  
 45 side of Equation (10) implies that if species 2 has an advantage on glucose  
 46 compared to maltose ( $G_2^{gluc}/M_2^{gluc} > G_2^{malt}/M_2^{malt}$ ), then, for the two species to co-  
 47 exist, this relative advantage should not be too large (as species 2 would  
 48 outcompete species 1), i.e. the efficiency  $E_2^{gluc}$  should not be too large compared to  
 49  $E_2^{malt}$ . Similar reasoning holds for the left hand side, namely that for species 1 the  
 50 relative advantage on maltose (compared to glucose) should not be too large, i.e. the  
 51 efficiency  $E_1^{malt}$  should not be too large compared to  $E_1^{gluc}$ . In addition, the middle

52 section of equation (10) implies that the glucose input should not be too small  
 53 compared to the maltose input (as otherwise species 2 will go extinct), and vice  
 54 versa.

55

## 56 **Appendix B: Forestomach parameter values**

57 Assume a mouse of 20 g, and let the forestomach be 2% of BW = 0.4 ml. Let water  
 58 intake be 10% of body weight (BW) per day, so that  $k = 2/0.4 \text{ d}^{-1} = 0.2/\text{h}$ . Let dry  
 59 matter intake be 1% of BW/d, of which 1% is assumed to be as glucose and 1% as  
 60 maltose. Then glucose and maltose intakes are 2 mg/d each, and combined with  
 61 water intake of 2 mL/d, the substrate concentration  $C_{in}$  in the medium entering the  
 62 vessel is 1 mg/mL for both maltose and glucose. The maximum growth rates are set  
 63 equal to  $\text{LN}(2)/\text{doubling time}$ , with doubling times as reported in the Results  
 64 section, so that  $G_1^{malt} = 0.87/\text{h}$ ,  $G_1^{gluc} = 0.47/\text{h}$ ,  $G_2^{malt} = 0.78/\text{h}$  and  $G_2^{gluc} = 1.09/\text{h}$ . The  
 65 affinities ( $1/M$ ) are set such that 100-33 shows a very strong affinity for glucose and  
 66 100-23 shows a strong affinity for maltose, whilst its affinity for glucose is assumed  
 67 half that of maltose. The affinity of 100-33 for maltose is assumed weakest. The  
 68 values used are  $M_2^{gluc} = 0.01$ ,  $M_1^{malt} = 0.1$ ,  $M_1^{gluc} = 0.2$  and  $M_2^{malt} = 0.4 \text{ mg/mL}$ , and  
 69 loosely agree with the observed transport rates into the cell (Figure 5). The  
 70 efficiency  $E$  of converting substrate into biomass was set to 0.5 g biomass/g  
 71 substrate for both species and both substrates. This is an arbitrary choice due to  
 72 lack of data.

73 With these parameter settings the requirements for co-existence have been  
 74 met; namely equation (9) becomes  $6.7 > 1.5$  and  $89 > 1.4$ , whilst equation (10)

75 becomes  $0.3 < 17.2 < 55.9$ . The substrate concentrations in steady state are 0.03  
 76 mg/mL for maltose and 0.002mg/mL for glucose. The biomass concentrations for  
 77 100-23 and 100-33 are 0.34 and 0.64 mg/mL respectively, indicating that under the  
 78 above conditions the two species co-exist in numbers of similar magnitude. For 100-  
 79 23 98% of its biomass gain is derived from maltose (with the remaining 2% from  
 80 glucose), whilst for 100-33 77% of its growth is derived from glucose (with the  
 81 remaining 23% from maltose).

82

### 83 **Appendix C: Steady state solution**

84 Without loss of generality it has been assumed that species 1 has a relative  
 85 advantage on maltose. In steady state, equations (1)-(4) are equal to zero. Then

$$k = G_{1obs}^{malt} + G_{1obs}^{gluc} \quad (11)$$

$$k = G_{2obs}^{malt} + G_{2obs}^{gluc} \quad (12)$$

86 Substituting equations (5)-(6) into (11) and (7)-(8) into (12) gives:

$$k = \frac{\frac{G_1^{malt}}{M_1^{malt}} C^{malt} + \frac{G_1^{gluc}}{M_1^{gluc}} C^{gluc}}{1 + \frac{1}{M_1^{malt}} C^{malt} + \frac{1}{M_1^{gluc}} C^{gluc}}$$

$$k = \frac{\frac{G_2^{malt}}{M_2^{malt}} C^{malt} + \frac{G_2^{gluc}}{M_2^{gluc}} C^{gluc}}{1 + \frac{1}{M_2^{malt}} C^{malt} + \frac{1}{M_2^{gluc}} C^{gluc}}$$

87 Write  $a = G_1^{malt}/M_1^{malt}$ ,  $b = G_1^{gluc}/M_1^{gluc}$ ,  $c = 1/M_1^{malt}$ ,  $d = 1/M_1^{gluc}$ ,  $e =$

88  $G_2^{malt}/M_2^{malt}$ ,  $f = G_2^{gluc}/M_2^{gluc}$ ,  $g = 1/M_2^{malt}$ ,  $h = 1/M_2^{gluc}$ :

$$k = \frac{a C^{malt} + b C^{gluc}}{1 + c C^{malt} + d C^{gluc}}$$

$$k = \frac{e C^{malt} + f C^{gluc}}{1 + g C^{malt} + h C^{gluc}}$$

89 These can be rewritten into

$$k = (a - kc)C^{malt} + (b - kd)C^{gluc}$$

$$k = (e - kg)C^{malt} + (f - kh)C^{gluc}$$

90 These solve for  $C^{malt}$  and  $C^{gluc}$  as

$$C^{malt} = \frac{[(f - kh) - (b - kd)] k}{(a - kc)(f - kh) - (b - kd)(e - kg)}$$

$$C^{gluc} = \frac{[(a - kc) - (e - kg)] k}{(a - kc)(f - kh) - (b - kd)(e - kg)}$$

91 For a valid steady state solution (i.e.  $C^{malt} > 0$  and  $C^{gluc} > 0$ ) we require

92  $(a - kc) > (e - kg)$  and  $(f - kh) > (b - kd)$ , i.e.:

$$\frac{G_1^{malt} - k}{M_1^{malt}} > \frac{G_2^{malt} - k}{M_2^{malt}} \quad \text{and} \quad \frac{G_2^{gluc} - k}{M_2^{gluc}} > \frac{G_1^{gluc} - k}{M_1^{gluc}}$$

93 In steady state, equations (1)-(2) are also equal to zero and this gives

$$B_1 G_{1obs}^{malt} / E_1^{malt} + B_2 G_{2obs}^{malt} / E_2^{malt} = k(C_{in}^{malt} - C^{malt})$$

$$B_1 G_{1obs}^{gluc} / E_1^{gluc} + B_2 G_{2obs}^{gluc} / E_2^{gluc} = k(C_{in}^{gluc} - C^{gluc})$$

94 Writing  $l = G_{1obs}^{malt} / E_1^{malt}$ ,  $m = G_{2obs}^{malt} / E_2^{malt}$ ,  $n = k(C_{in}^{malt} - C^{malt})$ ,  $p =$

95  $G_{1obs}^{gluc} / E_1^{gluc}$ ,  $q = G_{2obs}^{gluc} / E_2^{gluc}$ , and  $r = k(C_{in}^{gluc} - C^{gluc})$ :

$$l B_1 + m B_2 = n$$

$$p B_1 + q B_2 = r$$

96 which gives  $B_1 = (nq - mr)/(lq - mp)$  and  $B_2 = (lr - np)/(lq - mp)$ . For  $B_1 > 0$   
 97 and  $B_2 > 0$  we need  $(nq - mr) > 0$  and  $(lq - mp) > 0$  and  $(lr - np) > 0$ . This can  
 98 be rearranged into  $p/l < r/n < q/m$ , i.e.

$$\frac{G_{1obs}^{gluc} E_1^{malt}}{G_{1obs}^{malt} E_1^{gluc}} < \frac{C_{in}^{gluc} - C^{gluc}}{C_{in}^{malt} - C^{malt}} < \frac{G_{2obs}^{gluc} E_2^{malt}}{G_{2obs}^{malt} E_2^{gluc}}$$

99 Replacing  $G_{1obs}^{gluc}$ ,  $G_{1obs}^{malt}$ ,  $G_{2obs}^{gluc}$  and  $G_{2obs}^{malt}$  by equations (5) –(8), and multiplication by  
 100  $C^{malt}/C^{gluc}$  gives:

$$\frac{G_1^{gluc}/M_1^{gluc}}{G_1^{malt}/M_1^{malt}} \frac{E_1^{malt}}{E_1^{gluc}} < \frac{(C_{in}^{gluc} - C^{gluc})/C^{gluc}}{(C_{in}^{malt} - C^{malt})/C^{malt}} < \frac{G_2^{gluc}/M_2^{gluc}}{G_2^{malt}/M_2^{malt}} \frac{E_2^{malt}}{E_2^{gluc}}$$

101
